# Supplementary material for: Tracking crop varieties using genotyping-by-sequencing markers: a case study using cassava (Manihot esculenta Crantz)
Source: PubMed Central journal article supplement (PMC4580218; doi:10.1186/s12863-015-0273-1), 2015-09-23

# Variety I (TME117)

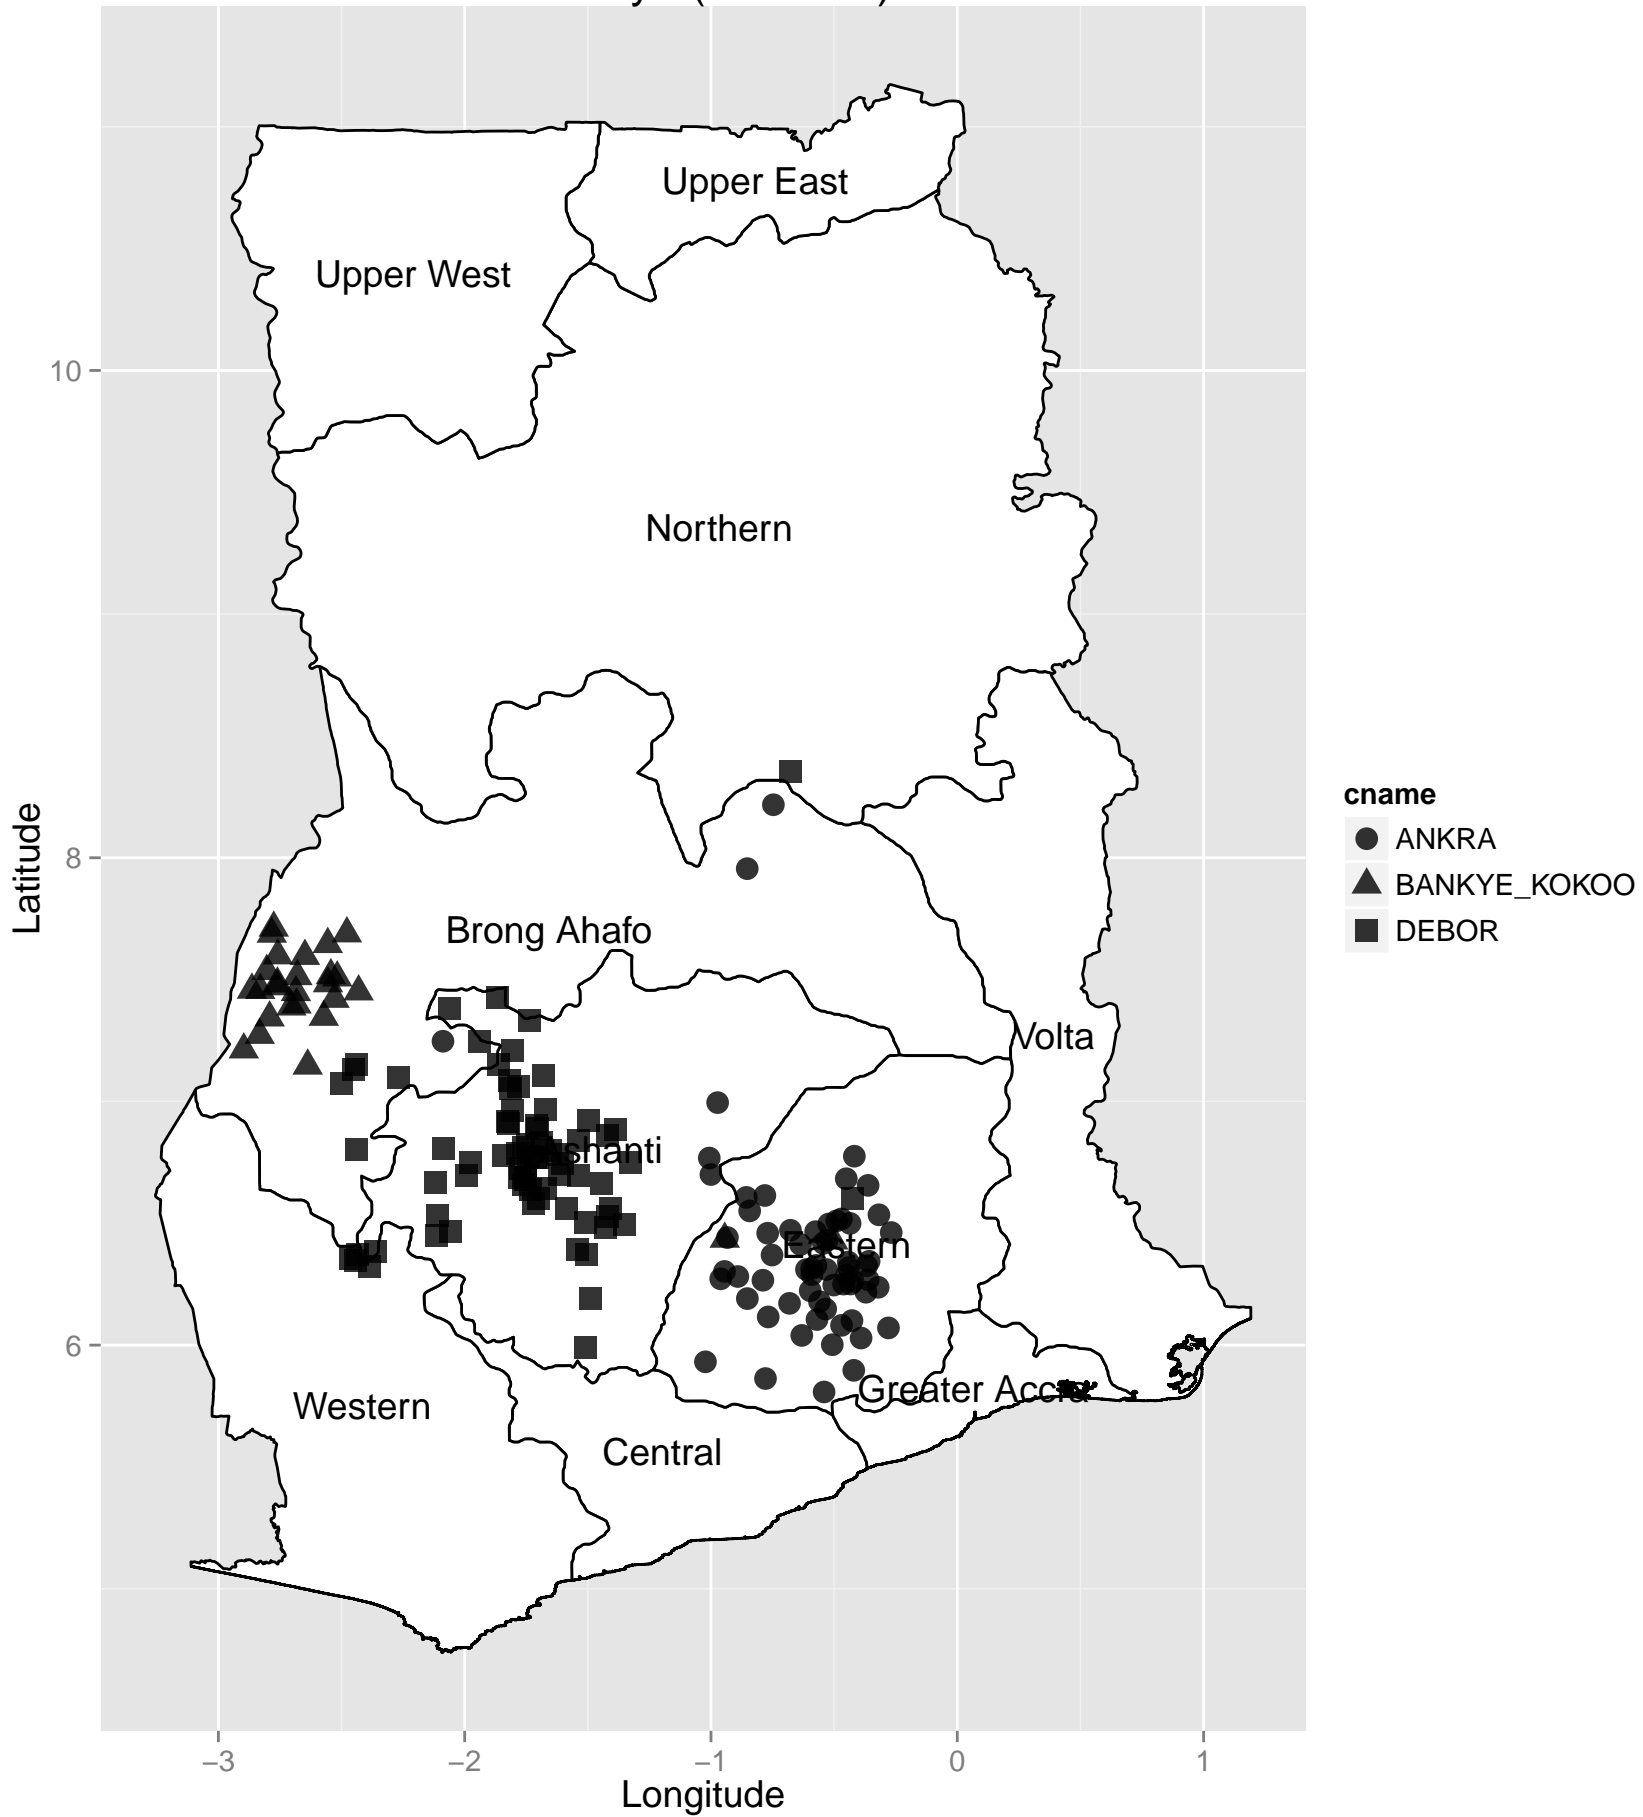

Supplement: 12863_2015_273_MOESM2_ESM.pdf [file 12863_2015_273_MOESM2_ESM.pdf]
